# Association of Inpatient Glucose Measurements With Amputations in Patients Hospitalized With Acute Diabetic Foot

Shahar Peled,<sup>1,2\*</sup> Rena Pollack,<sup>2\*</sup> Ofer Elishoov,<sup>3</sup> Amir Haze,<sup>3</sup> and Avivit Cahn<sup>1,2</sup>

<sup>1</sup>Diabetes Unit, Hadassah Medical Center, Hebrew University of Jerusalem, Faculty of Medicine, Jerusalem 91120, Israel; <sup>2</sup>Department of Endocrinology and Metabolism, Hadassah Medical Center, Hebrew University of Jerusalem, Faculty of Medicine, Jerusalem 91120, Israel; and <sup>3</sup>Department of Orthopedics, Hadassah Medical Center, Hebrew University of Jerusalem, Faculty of Medicine, Jerusalem 91120, Israel

**ORCID numbers:** 0000-0002-7830-9994 (A. Cahn).

**Context:** The association of inpatient glucose measurements with amputations in patients admitted with acute diabetic foot has not been described.

**Objective:** To evaluate the relationship of hyperglycemia, hypoglycemia, and glucose variability during hospitalization with amputations in patients hospitalized with acute diabetic foot.

**Design:** Retrospective cohort study.

**Setting:** Academic tertiary hospital.

**Patients:** We reviewed demographic, clinical, laboratory, and point-of-care glucose data in patients hospitalized with acute diabetic foot in the Diabetic Foot Unit during 2015 through 2017.

**Main Outcome Measures:** The primary outcomes were any or major amputations during hospitalization. Secondary outcomes included length of hospitalization and in-hospital mortality.

**Results:** During the study period, 418 patients were hospitalized in the Diabetic Foot Unit and 45,496 glucose measurements were taken. Patients experiencing any hyperglycemia and any or severe hypoglycemia were more likely to undergo any or major amputations during hospitalization. High glycemic variability was associated with major amputations. Peripheral vascular disease (PVD), high Wagner score, and hypoglycemia were independent predictors of amputations. Older age, PVD, previous amputation, elevated white blood cell level, high Wagner score, and hypoglycemia were independent predictors of major amputations.

**Conclusions:** In-patient hypoglycemia emerged as an independent risk factor for any and major amputations. Although it is unclear whether hypoglycemia directly contributes to adverse outcomes or is simply a biomarker of disease severity, efforts to minimize in-hospital hypoglycemic events are warranted. (*J Clin Endocrinol Metab* 104: 5445–5452, 2019)

**D**iabetic foot ulcers (DFUs) are a devastating complication of diabetes and have been associated with increased risk of lower-extremity amputation, high morbidity, and mortality (1). The global prevalence of foot ulcers in patients with diabetes is 6.3%, ranging from 3%

in Oceania to 13% in North America, with an estimated lifetime incidence as high as 25% (2). It is estimated that 50% to 70% of lower-extremity amputations are preceded by a DFU, and worldwide, a limb is lost due to diabetes every 30 seconds (1). Not only are DFUs a significant

financial burden, they result in impairment of quality of life and are associated with reduced life expectancy, with 5-year mortality rates between 43% and 55% (3, 4). Major risk factors for DFUs include sensory loss from advanced peripheral neuropathy, peripheral vascular disease (PVD), diabetes duration, poor glycemic control, smoking, and prior history of DFU or amputation (2, 5).

Extensive evidence from observational and prospective randomized clinical trials demonstrates that both hyperglycemia and hypoglycemia are associated with prolonged hospital stay and poor clinical outcomes, including increased mortality, infections, and in-hospital complications (6). The association correlates with the severity of hyperglycemia on admission as well as during hospitalization. Poor glycemic control has been shown to be associated with increased amputation risk; however, its association with amputations in patients with an established DFU is less clear (7).

The objective of this study was to evaluate the relationship of hyperglycemia, hypoglycemia, and glucose variability during hospitalization for DFU and to examine the association with length of hospital stay, amputation rate and extent, as well as mortality. We hypothesized that tighter glycemic control and lower rates of hypoglycemia would be associated with shorter length of hospitalization and reduced amputation rate.

## Materials and Methods

### Study setting

This retrospective study was conducted in a Diabetic Foot Unit, located in a large, tertiary hospital. All patients in the unit are managed according to established protocols for glucose monitoring, basal-bolus insulin treatment regimen, and wound treatment in hospitalized patients. Data were collected from electronic medical records in the hospital. For each admission, the clinical condition and medical history of the patient were obtained, including type of diabetes, insulin use, dialysis, ischemic heart disease, smoking, previous amputations, PVD, and previous hospitalizations, as well as regular use of medication. Additionally, the vital signs (temperature and blood pressure) and blood tests [blood glucose, creatinine, white blood cell (WBC) level, C-reactive protein (CRP) level] documented upon admission to the hospital were collected. The Wagner classification score of the ulcer was ascertained by reviewing the text describing the physical examination of the foot. The presence of osteomyelitis (consistent with a Wagner score of 3) was also determined by imaging done on admission.

The study was approved by the hospital's local Helsinki Committee.

### Inpatient glucose control

The Diabetic Foot Unit implemented an insulin protocol upon its establishment in late 2010. Per the protocol, all patients are transitioned to basal-bolus insulin therapy upon admission. The starting total daily dose of insulin is 0.3 U/kg, divided

equally into a single basal dose and three premeal bolus doses. In the case of premeal sugar exceeding 150 mg/dL, a correction dose of insulin is added to the dose in a stepwise manner. Patients who have already been taking basal insulin prior to admission are prescribed doses similar to their preadmission dosing, with the addition of prandial insulin. Patients on basal-bolus regimens are prescribed their standard regimen with corrections added as needed. Daily glucose measurements and insulin doses administered are reviewed by the treating physician daily and insulin doses are adjusted as needed. An endocrine consultation can be requested *ad hoc*. Additionally, glucose and insulin values are reviewed by a diabetes specialist and diabetes nurse during weekly multidisciplinary rounds.

Inpatient glucose levels are measured using a single departmental glucometer, the Accu-Chek Inform II portable glucometer (Roche Diagnostics), which has advanced connectivity features and automatically records the measured glucose levels in the electronic medical record. The glucometer is calibrated periodically as required by international standards for inpatient care. The Freestyle Optium Neo (Abbott Diabetes Care) is a point-of-care glucometer approved for in-patient use but lacks the connectivity features. It is used in the infrequent event of malfunction of the connected glucometer. It is calibrated periodically as well.

### Inclusion and exclusion criteria

All patients admitted between 1 January 2015 until 31 December 2017 with a diagnosis of acute diabetic foot, defined as acute infection of a DFU or acute/critical ischemia in a patient with DFU mandating urgent intervention. Patients were included only when their entire hospitalization was during this period. Admission date was defined as date of admission to the Diabetic Foot Unit, and discharge date was defined as last day in the hospital or mortality. Patients who were hospitalized for  $\leq 3$  days or had fewer than five glucose measurements were excluded from the study.

### Definitions of glycemic variables

Blood glucose values were based on venous blood samples and point-of-care glucose values. Hyperglycemia was defined as at least three blood glucose measurements of  $\geq 250$  mg/dL (13.9 mmol/L) and severe hyperglycemia as at least three measurements of blood glucose  $\geq 350$  mg/dL (19.4 mmol/L). These relatively high thresholds were chosen due to the overall poor glycemic control of our multimorbid population, whereby the vast majority exceeded the acceptable inpatient glycemic targets of  $<180$  mg/dL (10 mmol/L). Hypoglycemia was defined as at least one blood glucose measurement of  $<70$  mg/dL (3.9 mmol/L) and severe hypoglycemia as at least one measurement of blood glucose  $<54$  mg/dL (3 mmol/L). Coefficient of variation (CV) was defined as standard deviation of glucose measurements divided by mean blood glucose level. High and low CVs were considered above and below the median accordingly.

### Outcomes

The primary outcomes were (i) any amputation during hospitalization or (ii) major amputation, defined as an amputation proximal to the calcaneus. Secondary outcomes included (i) length of hospitalization and (ii) in-hospital mortality.

## Statistical analysis

Continuous variables are presented as mean  $\pm$  SD; categorical variables are presented as number (%). A  $\chi^2$  test (for two or more groups) was used to compare the value of categorical variables between all subgroups in this study, and the  $t$  test was used to compare continuous variables among these subgroups.

The association between covariates and outcomes in multivariate analysis was assessed using logistic regression. We included all variables with  $P < 0.15$  in the unadjusted model, which did not have high multicollinearity with other variables in the multivariate analysis. All unadjusted ORs, adjusted ORs, and 95% CIs are presented. Logistic regressions were repeated as a sensitivity analysis, excluding patients with type 1 diabetes.

The statistical analyses for this study were generated using IBM SPSS statistics, version 25.

## Results

### Study cohort

During the study period, there were 425 admissions. After applying the exclusion criteria, the cohort consisted of 418 hospitalizations. Baseline characteristics are shown in Table 1. Most patients were of male sex, with type 2 diabetes, insulin treated, and with advanced diabetic foot disease. Of note, canagliflozin, which had been associated with increased risk of amputations (8), was not used by any of the patients because it is not approved for use in our country. During this study, 45,496 blood glucose measurements were performed, with a mean of 108.8 measurements per hospitalization and 4.7 measurements per day.

During hospitalization, 305 (73%) patients experienced hyperglycemia, including 124 (30%) with severe hyperglycemia. Hypoglycemia was noted in 201 (48%) patients, including 94 (22%) with severe hypoglycemia. The median glycemic CV was 34%. Baseline characteristics of patients stratified by glucose status are shown in Table 1. Patients who experienced hyperglycemia were more likely to be smokers, using insulin, and with a higher Wagner score. Additionally, they had higher WBC and CRP levels on admission. Patients with hypoglycemia were more likely to be older, on dialysis, have a history of PVD, have higher Wagner score, and receive treatment with insulin. Those with high glucose variability were more likely to be on dialysis and have PVD, an estimated glomerular filtration rate of  $<60$  mL/min/1.73 m<sup>2</sup>, insulin use, a higher Wagner score, and elevated baseline WBC and CRP levels.

### Outcomes

During hospitalization, 229 (55%) patients had undergone amputation, of whom 108 (47%) had a major amputation. Patients experiencing hyperglycemia or hypoglycemia during admission were more likely to experience any or major amputations. Severe hypoglycemia but not

severe hyperglycemia was significantly associated with any and major amputations. High glucose variability was associated with higher risk of major amputations (Fig. 1; Tables 2 and 3). The average length of hospitalization was  $23 \pm 20.4$  days, and the median hospitalization was 17 days (interquartile range, 9 to 31 days). Poor glycemic control was associated with longer length of stay. In-hospital mortality was 6% (26 patients). High glycemic variability was associated with increased mortality ( $P = 0.04$ ), yet the association with hypoglycemia was of borderline significance ( $P = 0.07$ ) (Table 4).

### Predictors of amputations

In univariate analyses multiple clinical and laboratory variables were associated with amputations and major amputations (Tables 2 and 3). The multivariate analysis included all significant parameters excluding CRP levels, which showed multicollinearity with WBC levels. Similarly, severe hyperglycemia and hypoglycemia were excluded owing to the inclusion of any hyperglycemia and hypoglycemia, which showed stronger association in the unadjusted model. Increased Wagner ulcer classification score on admission, PVD, and any hypoglycemia were independently associated with any amputations (Table 2). Independent predictors of major amputations included age, WBC level, PVD, a history of previous amputation, Wagner ulcer classification score of 4 to 5 vs 3, and any hypoglycemia (Table 3). Sensitivity analysis excluding patients with type 1 diabetes mellitus showed similar trends, with hypoglycemia remaining an independent predictor of amputations and major amputations.

## Discussion

In this retrospective study of hospitalized patients with acute diabetic foot, we demonstrate an independent association of hypoglycemic events and adverse outcomes, including any and major amputations. Although patients who experienced hyperglycemia during hospitalization were more likely to require amputation, it did not emerge as an independent variable.

Previous studies have evaluated the relationship of glycemic control and diabetic foot outcomes. A meta-analysis of nine randomized controlled trials found that intensive glycemic control (HbA1c of 6% to 7.5%) was associated with a 35% reduced risk of amputations in patients with diabetic foot syndrome (1). Other studies have shown mixed results, with some studies showing a direct relationship between HbA1c and wound healing or amputation rate, although most studies were unable to demonstrate an association between acute glycemic control, wound outcome, or amputation rate in patients

Table 1. Baseline Characteristics of Patients by Glycemic Indices During Hospitalization

|                                      | Hyper<br>(N = 305)       | No Hyper<br>(N = 113) | Severe<br>Hyper<br>(N = 124) | No Severe<br>Hyper<br>(N = 294) | Hypo<br>(N = 201)        | No Hypo<br>(N = 217) | Severe Hypo<br>(N = 94)  | No Severe Hypo<br>(N = 324) | High CV<br>(N = 209)     | Low CV<br>(N = 209) | Overall     |
|--------------------------------------|--------------------------|-----------------------|------------------------------|---------------------------------|--------------------------|----------------------|--------------------------|-----------------------------|--------------------------|---------------------|-------------|
| Age, y                               | 64.8 ± 12.4              | 64.7 ± 13.7           | 64 ± 12.9                    | 65 ± 12.7                       | 66.6 ± 12.7 <sup>a</sup> | 63.0 ± 12.5          | 67.5 ± 13.8 <sup>b</sup> | 63.9 ± 12.3                 | 65.4 ± 12.6              | 64.1 ± 12.9         | 64.8 ± 12.8 |
| Male sex                             | 233 (76.4)               | 78 (69.0)             | 98 (79.0)                    | 213 (72.4)                      | 146 (72.6)               | 165 (76.0)           | 65 (69.1)                | 246 (75.9)                  | 156 (74.6)               | 155 (74.2)          | 311 (74.4)  |
| Type 2 diabetes                      | 282 (92.5)               | 105 (92.9)            | 110 (88.7)                   | 277 (94.2)                      | 184 (91.5)               | 203 (93.5)           | 81 (86.2) <sup>b</sup>   | 306 (94.4)                  | 191 (91.4)               | 195 (93.8)          | 387 (92.6)  |
| Insulin use                          | 220 (72.1) <sup>c</sup>  | 53 (46.9)             | 96 (77.4) <sup>c</sup>       | 177 (60.2)                      | 143 (71.1) <sup>b</sup>  | 130 (59.9)           | 65 (69.1)                | 208 (64.2)                  | 153 (73.2) <sup>c</sup>  | 120 (57.4)          | 273 (65.3)  |
| Current smoking                      | 67 (22.0) <sup>b</sup>   | 13 (12.4)             | 32 (25.8) <sup>b</sup>       | 49 (16.7)                       | 32 (15.9)                | 49 (22.6)            | 16 (17.0)                | 65 (20.1)                   | 41 (19.6)                | 40 (19.1)           | 81 (19.4)   |
| IHD                                  | 131 (43.0)               | 43 (38.1)             | 51 (41.1)                    | 123 (41.8)                      | 89 (44.3)                | 85 (39.2)            | 42 (44.7)                | 132 (40.7)                  | 91 (43.5)                | 83 (39.7)           | 174 (41.6)  |
| PVD                                  | 208 (68.2)               | 70 (61.9)             | 85 (68.5)                    | 193 (65.6)                      | 146 (72.6) <sup>b</sup>  | 132 (60.8)           | 68 (72.3)                | 210 (64.8)                  | 151 (72.2) <sup>b</sup>  | 127 (60.8)          | 278 (66.5)  |
| Previous amputation                  | 96 (31.5)                | 42 (37.2)             | 48 (38.7)                    | 90 (30.6)                       | 71 (35.3)                | 67 (30.9)            | 31 (33.0)                | 107 (33.0)                  | 70 (33.5)                | 68 (32.5)           | 138 (33.0)  |
| eGFR, mL/min/1.73 m <sup>2d</sup>    | 67.1 ± 32.2              | 72.9 ± 33.3           | 63.0 ± 30.8 <sup>b</sup>     | 71.3 ± 33.1                     | 66.3 ± 29.1              | 70.6 ± 35.0          | 61.8 ± 29.7              | 70.3 ± 33.1                 | 65.1 ± 32.8              | 71.8 ± 32.1         | 68.7 ± 32.6 |
| eGFR, <60 mL/min/1.73 m <sup>2</sup> | 124 (40.7)               | 36 (31.9)             | 61 (49.2) <sup>b</sup>       | 99 (33.7)                       | 74 (36.8)                | 86 (39.8)            | 38 (40.4)                | 122 (37.7)                  | 87 (41.6) <sup>a</sup>   | 73 (34.9)           | 160 (38.3)  |
| Dialysis                             | 51 (16.7)                | 21 (18.6)             | 15 (12.1)                    | 57 (19.4)                       | 46 (22.9) <sup>a</sup>   | 26 (12.0)            | 26 (27.7) <sup>a</sup>   | 46 (14.2)                   | 47 (22.5) <sup>a</sup>   | 25 (12.0)           | 72 (17.2)   |
| WBCs, 10 <sup>3</sup> /μL            | 13.6 ± 5.4 <sup>b</sup>  | 11.3 ± 3.9            | 13.8 ± 5.4 <sup>b</sup>      | 12.6 ± 5                        | 13.3 ± 5.7               | 12.7 ± 4.6           | 13.9 ± 10.6              | 12.7 ± 4.8                  | 13.6 ± 5.7 <sup>a</sup>  | 12.3 ± 4.4          | 13.0 ± 5.1  |
| CRP level, mg/dL                     | 14.7 ± 11.1 <sup>a</sup> | 9.5 ± 8.5             | 17.4 ± 12.1 <sup>c</sup>     | 11.5 ± 9.5                      | 13.1 ± 10.2              | 13.4 ± 11.1          | 14.6 ± 11.0              | 12.9 ± 10.5                 | 14.7 ± 11.5 <sup>b</sup> | 11.9 ± 9.6          | 13.3 ± 10.7 |
| Wagner classification                |                          |                       |                              |                                 | <sup>c</sup>             |                      |                          |                             |                          |                     |             |
| 1–2                                  | 21 (6.9)                 | 20 (17.7)             | 8 (6.5)                      | 33 (11.2)                       | 9 (4.5)                  | 32 (14.7)            | 5 (5.3)                  | 36 (11.1)                   | 13 (6.2)                 | 28 (13.4)           | 41 (9.8)    |
| 3                                    | 104 (34.1)               | 34 (30.1)             | 44 (35.5)                    | 94 (32.0)                       | 53 (26.4)                | 85 (39.2)            | 27 (28.7)                | 111 (34.3)                  | 61 (29.2)                | 77 (36.8)           | 138 (33.0)  |
| 4–5                                  | 180 (59.0)               | 59 (52.2)             | 72 (58.1)                    | 167 (56.8)                      | 139 (69.2)               | 100 (46.1)           | 62 (66.0)                | 177 (54.6)                  | 135 (64.6)               | 104 (49.8)          | 239 (57.2)  |

Continuous parameters are shown as mean ± SD and categorical parameters as n (%).

Abbreviations: eGFR, estimated glomerular filtration rate; Hyper, hyperglycemia; Hypo, hypoglycemia; IHD, ischemic heart disease.

<sup>a</sup>*P* < 0.01.

<sup>b</sup>*P* < 0.05.

<sup>c</sup>*P* < 0.001.

<sup>d</sup>Calculated by Modification of Diet in Renal Disease, excluding patients on dialysis.

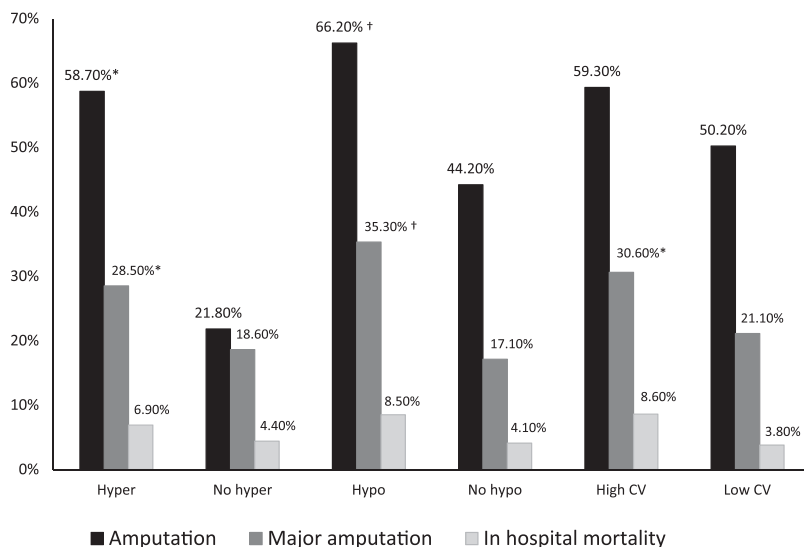

**Figure 1.** Association of glycemic indices with patient outcomes. \* $P < 0.05$ , † $P < 0.001$ .

with DFUs (2–8). A recent study examined the association between baseline HbA1c and change in HbA1c during treatment with wound healing in patients with DFUs and did not establish a clinically meaningful association between baseline or prospective HbA1C measurements (9). A limitation of the previous data is that glycemic control was determined by HbA1c rather

than serial glucose monitoring, which does not capture extent of hyperglycemia, hypoglycemia, or glucose variability.

Our finding of an independent relationship between inpatient hypoglycemia and any or major amputations is of interest. Hypoglycemia is not uncommon in hospitalized patients with diabetes mellitus, with an incidence ranging from 1% to 29%, depending on the definition used for hypoglycemia (10–17). Many factors may contribute to inpatient hypoglycemia, including poor nutrition, diabetes duration, renal failure, heart failure, advanced liver disease, advanced age, infection, and intensity of treatment regimen (18–21). Inpatient hypoglycemia is also known to be associated with increased short- and long-term mortality in patients with spontaneous and insulin-related hypoglycemia, as well as longer hospital stay (10, 17, 22). In the current study, we have found an association between inpatient hypoglycemia and any or major amputations. The association between hypoglycemia and mortality was of borderline

**Table 2.** Predictors Associated With Amputations

|                                      | Any Amputation<br>(N = 229) | No Amputation<br>(N = 189) | Unadjusted        |         | Adjusted          |         |
|--------------------------------------|-----------------------------|----------------------------|-------------------|---------|-------------------|---------|
|                                      |                             |                            | OR (CI 95%)       | P Value | OR (CI 95%)       | P Value |
| Age, y                               | 66.3 ± 11.7                 | 62.9 ± 13.7                | 1.02 (1.01, 1.04) | 0.0082  | 1 (0.98, 1.02)    | 0.89    |
| Male                                 | 170 (74.2)                  | 141 (74.6)                 | 0.98 (0.63, 1.53) | 0.9318  |                   |         |
| Insulin use                          | 156 (68.1)                  | 117 (61.9)                 | 1.32 (0.88, 1.97) | 0.1842  |                   |         |
| Smoking                              | 48 (21.0)                   | 33 (17.5)                  | 1.25 (0.77, 2.05) | 0.3681  |                   |         |
| IHD                                  | 106 (46.3)                  | 68 (36.0)                  | 1.53 (1.03, 2.28) | 0.0337  | 1.13 (0.68, 1.88) | 0.643   |
| Renal function                       |                             |                            |                   |         |                   |         |
| eGFR, >60 mL/min/1.73 m <sup>2</sup> | 95 (41.5)                   | 91 (48.1)                  | 1                 |         | 1                 |         |
| eGFR, <60 mL/min/1.73 m <sup>2</sup> | 86 (37.6)                   | 74 (39.1)                  | 1.11 (0.73, 1.7)  | 0.6195  | 0.89 (0.53, 1.49) | 0.659   |
| Dialysis                             | 48 (21.0)                   | 24 (12.7)                  | 1.92 (1.09, 3.38) | 0.0249  | 0.8 (0.4, 1.62)   | 0.5391  |
| PVD                                  | 178 (77.7)                  | 100 (52.9)                 | 3.11 (2.04, 4.74) | <0.0001 | 2.31 (1.36, 3.92) | 0.002   |
| Previous amputation                  | 78 (56.5)                   | 151 (53.9)                 | 1.11 (0.74, 1.67) | 0.6172  | 0.94 (0.57, 1.55) | 0.8017  |
| Systolic BP, mm Hg                   | 129.7 ± 21.3                | 133.8 ± 18.7               | 0.99 (0.98, 1)    | 0.0411  | 0.99 (0.98, 1)    | 0.1941  |
| Diastolic BP, mm Hg                  | 65.2 ± 13.6                 | 69.0 ± 13.65               | 0.98 (0.97, 0.99) | 0.005   | 1 (0.98, 1.02)    | 0.9458  |
| WBCs, 10 <sup>3</sup> /μL            | 13.5 ± 5.2                  | 12.3 ± 4.9                 | 1.05 (1.01, 1.09) | 0.0266  | 1.02 (0.97, 1.07) | 0.4063  |
| CRP level, mg/dL                     | 14.0 ± 11.2                 | 12.4 ± 10.0                | 1.01 (1, 1.03)    | 0.1303  |                   |         |
| Wagner score 1–2                     | 3 (1.3)                     | 38 (20.1)                  | 0.12 (0.04, 0.42) | 0.0008  | 0.12 (0.03, 0.43) | 0.0011  |
| Wagner score 3                       | 54 (23.6)                   | 84 (44.4)                  | 1                 |         | 1                 |         |
| Wagner score 4–5                     | 172 (75.1)                  | 67 (35.4)                  | 3.99 (2.56, 6.22) | <0.0001 | 2.93 (1.77, 4.88) | <0.0001 |
| Hyperglycemia                        | 179 (79.2)                  | 126 (66.7)                 | 1.79 (1.16, 2.77) | 0.0088  | 1.67 (0.93, 2.98) | 0.0848  |
| Severe hyperglycemia                 | 74 (32.3)                   | 50 (26.5)                  | 1.33 (0.87, 2.03) | 0.1924  |                   |         |
| Hypoglycemia                         | 133 (58.1)                  | 68 (36.0)                  | 2.47 (1.66, 3.66) | <0.0001 | 2.08 (1.24, 3.49) | 0.0052  |
| Severe hypoglycemia                  | 66 (28.8) <sup>†</sup>      | 28 (14.8)                  | 2.33 (1.42, 3.81) | 0.0008  |                   |         |
| High CV                              | 124 (54.1)                  | 85 (45.0)                  | 1.45 (0.98, 2.13) | 0.0623  | 0.63 (0.36, 1.1)  | 0.1014  |

Continuous parameters are shown as mean ± SD and categorical parameters as n (%).

Abbreviations: BP, blood pressure; eGFR, estimated glomerular filtration rate; IHD, ischemic heart disease.

**Table 3. Predictors Associated With Major Amputations**

|                                      | Major Amputation (N = 108) | No Major Amputation (N = 310) | Unadjusted         |         | Adjusted          |         |
|--------------------------------------|----------------------------|-------------------------------|--------------------|---------|-------------------|---------|
|                                      |                            |                               | OR (CI 95%)        | P Value | OR (CI 95%)       | P Value |
| Age, y                               | 70.4 ± 11.1                | 62.8 ± 12.7                   | 1.05 (1.03, 1.07)  | <0.0001 | 1.04 (1.02, 1.07) | 0.002   |
| Male                                 | 80 (74.1)                  | 231 (74.5)                    | 0.98 (0.59, 1.61)  | 0.9276  |                   |         |
| Insulin use                          | 79 (73.1)                  | 194 (62.6)                    | 1.63 (1, 2.64)     | 0.0482  | 1.56 (0.86, 2.81) | 0.1401  |
| Smoking                              | 23 (22.2)                  | 57 (18.4)                     | 1.27 (0.74, 2.17)  | 0.3859  |                   |         |
| IHD                                  | 59 (54.6)                  | 115 (37.1)                    | 2.04 (1.31, 3.18)  | 0.0016  | 0.94 (0.54, 1.65) | 0.8361  |
| Renal function                       |                            |                               |                    |         |                   |         |
| eGFR, >60 mL/min/1.73 m <sup>2</sup> | 34 (31.5)                  | 152 (49.0)                    | 1                  |         | 1                 |         |
| eGFR, <60 mL/min/1.73 m <sup>2</sup> | 42 (38.9)                  | 118 (38.1)                    | 3.58 (1.97, 6.49)  | <0.0001 | 1.8 (0.87, 3.71)  | 0.1131  |
| Dialysis                             | 32 (29.6)                  | 40 (12.9)                     | 1.59 (0.95, 2.66)  | 0.0755  | 1.12 (0.61, 2.08) | 0.7132  |
| PVD                                  | 98 (90.7)                  | 180 (58.1)                    | 7.08 (3.56, 14.09) | <0.0001 | 3.16 (1.46, 6.83) | 0.0036  |
| Previous amputation                  | 47 (34.1)                  | 61 (21.8)                     | 1.86 (1.18, 2.92)  | 0.0074  | 1.98 (1.13, 3.46) | 0.0169  |
| Systolic BP, mm Hg                   | 128.2 ± 22.5               | 132.75 ± 19.3                 | 0.99 (0.98, 1)     | 0.0446  | 1 (0.98, 1.01)    | 0.5472  |
| Diastolic BP, mm Hg                  | 62.9 ± 14.2                | 68.3 ± 13.3                   | 0.97 (0.96, 0.99)  | 0.0006  | 1 (0.98, 1.02)    | 0.8493  |
| WBCs, 10 <sup>3</sup> /μL            | 14.1 ± 5.8                 | 12.6 ± 4.8                    | 1.06 (1.02, 1.1)   | 0.0076  | 1.05 (1, 1.11)    | 0.0351  |
| CRP level, mg/dL                     | 15.1 ± 12.0                | 12.7 ± 10.8                   | 1.02 (1, 1.04)     | 0.0478  |                   |         |
| Wagner score 1–2                     | 1 (0.9)                    | 40 (12.9)                     | 0.24 (0.03, 1.9)   | 0.176   | 0.2 (0.02, 1.67)  | 0.1353  |
| Wagner score 3                       | 13 (12.0)                  | 125 (40.3)                    | 1                  |         | 1                 |         |
| Wagner score 4–5                     | 94 (87.0)                  | 145 (46.8)                    | 6.23 (3.33, 11.67) | <0.0001 | 3.48 (1.71, 7.12) | 0.0006  |
| Hyperglycemia                        | 87 (80.6)                  | 218 (70.3)                    | 1.75 (1.02, 2.99)  | 0.0408  | 1.75 (0.87, 3.53) | 0.1187  |
| Severe hyperglycemia                 | 36 (33.3)                  | 88 (28.4)                     | 1.26 (0.79, 2.02)  | 0.333   |                   |         |
| Hypoglycemia                         | 71 (65.7)                  | 130 (41.9)                    | 2.66 (1.68, 4.2)   | <0.0001 | 1.98 (1.08, 3.64) | 0.0284  |
| Severe hypoglycemia                  | 41 (38.0)                  | 53 (17.1)                     | 2.97 (1.82, 4.84)  | <0.0001 |                   |         |
| High CV                              | 64 (59.3)                  | 145 (46.8)                    | 1.66 (1.06, 2.58)  | 0.0261  | 0.65 (0.34, 1.25) | 0.1979  |

Continuous parameters are shown as mean ± SD and categorical parameters as n (%).

Abbreviations: BP, blood pressure; eGFR, estimated glomerular filtration rate; IHD, ischemic heart disease.

significance ( $P = 0.07$ ); however, mortality rates were low. Several possible explanations can account for this association. First, hypoglycemia may simply be a marker of more severe illness, and therefore such patients may be more at risk for amputation. As demonstrated by our data, patients who experienced hypoglycemia during hospitalization were more likely to be on dialysis, have PVD, and be on insulin treatment. Second, hypoglycemia may induce a stress response, resulting in endothelial dysfunction and impaired wound healing (23–26). Lastly, acute hypoglycemia has been shown to result in complex vascular effects, including activation of prothrombotic, proinflammatory, and profibrinolytic

pathways (27–29). Such changes, especially in the presence of a compromised vasculature, may further contribute to adverse vascular effects or amputation risk.

In our study, review of inpatient glycemic parameters enabled us to analyze the glucose dynamics, including hyperglycemia, hypoglycemia, and glucose variability, during hospitalization. To our knowledge, this is the first study to analyze the relationship between inpatient glucose values and acute diabetic foot outcomes. Although hyperglycemia in our patient cohort was frequent, a significant association with diabetic foot outcomes was not found. The considerable number of hyperglycemic events may be indicative of a sicker patient

**Table 4. Association of Glycemic Indices With Length of Stay and Inpatient Mortality**

|                         | Length of Hospitalization, Days (Mean ± SD) | P      | In-Hospital Mortality [n (%)] |      |
|-------------------------|---------------------------------------------|--------|-------------------------------|------|
|                         |                                             |        |                               | P    |
| Hyperglycemia           | 26.4 ± 22.2                                 | <0.001 | 21 (80.8)                     | 0.35 |
| No hyperglycemia        | 14.2 ± 10.8                                 |        | 5 (19.2)                      |      |
| Severe hyperglycemia    | 31.3 ± 23.3                                 | 0.001  | 9 (34.6)                      | 0.57 |
| No severe hyperglycemia | 19.65 ± 18.0                                |        | 17 (65.4)                     |      |
| Hypoglycemia            | 30.7 ± 24.9                                 | <0.001 | 17 (65.4)                     | 0.07 |
| No hypoglycemia         | 16.1 ± 11.4                                 |        | 9 (34.6)                      |      |
| Severe hypoglycemia     | 34.8 ± 28.2                                 | <0.001 | 9 (34.6)                      | 0.13 |
| No severe hypoglycemia  | 19.7 ± 16.1                                 |        | 17 (65.4)                     |      |
| High CV                 | 26.4 ± 22.1                                 | 0.005  | 18 (69.2)                     | 0.04 |
| Low CV                  | 19.8 ± 18.1                                 |        | 8 (30.8)                      |      |

population but may also be attributed to the lack of a computerized insulin-adjustment protocol at our institution. The significance of hypoglycemia but not hyperglycemia in predicting adverse outcomes in patients hospitalized with acute diabetic foot may explain the lack of association of HbA1c with wound healing in some studies. Because HbA1c is a gross measure of glycemic control and may be lower in the presence of hypoglycemic events, the contribution of hyperglycemia to adverse diabetic foot outcomes is not captured when including sick patients with frequent hypoglycemia.

The strength of our study lies in our large cohort of patients admitted with acute diabetic foot, for whom we have computerized access to glucose values and laboratory data throughout the admission. These data have allowed us to analyze the extent of hypoglycemia, hyperglycemia, and glucose variability during hospitalization. Additionally, patients admitted to our Diabetic Foot Unit are treated by a standardized insulin protocol and followed by a multidisciplinary team, which includes a diabetologist and a diabetes nurse.

Several limitations of our study are noted. First, our study is retrospective in nature and the clinical data were extrapolated from the patient files. In particular, the Wagner ulcer classification grade was assessed from the textual description of the physical examination, and not formally documented by the physician at the time of admission. Second, as in any observational study, there may be residual bias or confounders, as patients who were more severely ill were more likely to undergo amputations as well as to experience glucose abnormalities. Third, HbA1c measurements were unavailable, limiting our ability to include glycemic status prior to hospitalization as a factor.

In conclusion, we demonstrate an important association between inpatient hypoglycemia and acute diabetic foot outcomes. Although it is unclear whether hypoglycemia directly contributes to adverse outcomes or is simply a biomarker of disease severity, efforts to minimize in-hospital hypoglycemic events are warranted.

## Acknowledgments

The authors are grateful to Tali Bdolach, Aliza Rozenberg, and Ilan Yanuv for statistical assistance. These data were presented in the 8th International Symposium on the Diabetic Foot, 22–25 May 2019, The Hague, Netherlands.

## Additional Information

**Correspondence and Reprint Requests:** Avivit Cahn, MD, Diabetes Unit, Endocrinology and Metabolism Unit, Hadassah Hebrew University Hospital, Post Office Box 12000, Jerusalem 91120, Israel. E-mail: [avivit@hadassah.org.il](mailto:avivit@hadassah.org.il).

**Disclosure Summary:** The authors have nothing to disclose.

**Data Availability:** The datasets generated during and/or analyzed during the current study are not publicly available but are available from the corresponding author on reasonable request.

## References and Notes

1. Jones NJ, Harding K. 2015 International Working Group on the Diabetic Foot Guidance on the prevention and management of foot problems in diabetes. *Int Wound J*. 2015;12(4):373–374.
2. Zhang P, Lu J, Jing Y, Tang S, Zhu D, Bi Y. Global epidemiology of diabetic foot ulceration: a systematic review and meta-analysis †. *Ann Med*. 2017;49(2):106–116.
3. Robbins JM, Strauss G, Aron D, Long J, Kuba J, Kaplan Y. Mortality rates and diabetic foot ulcers: is it time to communicate mortality risk to patients with diabetic foot ulceration? *J Am Podiatr Med Assoc*. 2008;98(6):489–493.
4. Moulik PK, Mtonga R, Gill GV. Amputation and mortality in new-onset diabetic foot ulcers stratified by etiology. *Diabetes Care*. 2003;26(2):491–494.
5. Boyko EJ, Ahroni JH, Stensel V, Forsberg RC, Davignon DR, Smith DG. A prospective study of risk factors for diabetic foot ulcer. The Seattle Diabetic Foot Study. *Diabetes Care*. 1999;22(7):1036–1042.
6. Leibowitz G, Raizman E, Brezis M, Glaser B, Raz I, Shapira O. Effects of moderate intensity glycemic control after cardiac surgery. *Ann Thorac Surg*. 2010;90(6):1825–1832.
7. Adler AI, Erqou S, Lima TA, Robinson AH. Association between glycated haemoglobin and the risk of lower extremity amputation in patients with diabetes mellitus—review and meta-analysis. *Diabetologia*. 2010;53(5):840–849.
8. Neal B, Perkovic V, Mahaffey KW, de Zeeuw D, Fulcher G, Erond N, Shaw W, Law G, Desai M, Matthews DR; CANVAS Program Collaborative Group. Canagliflozin and cardiovascular and renal events in type 2 diabetes. *N Engl J Med*. 2017;377(7):644–657.
9. Fesseha BK, Abularrage CJ, Hines KF, Sherman R, Frost P, Langan S, Canner J, Likes KC, Hosseini SM, Jack G, Hicks CW, Yalamanchi S, Mathioudakis N. Association of hemoglobin A<sub>1c</sub> and wound healing in diabetic foot ulcers. *Diabetes Care*. 2018;41(7):1478–1485.
10. Turchin A, Matheny ME, Shubina M, Scanlon JV, Greenwood B, Pendergrass ML. Hypoglycemia and clinical outcomes in patients with diabetes hospitalized in the general ward. *Diabetes Care*. 2009;32(7):1153–1157.
11. Cook CB, Kongable GL, Potter DJ, Abad VJ, Leija DE, Anderson M. Inpatient glucose control: a glycemic survey of 126 U.S. hospitals. *J Hosp Med*. 2009;4(9):E7–E14.
12. Boucai L, Southern WN, Zonszein J. Hypoglycemia-associated mortality is not drug-associated but linked to comorbidities. *Am J Med*. 2011;124(11):1028–1035.
13. Krinsley JS, Grover A. Severe hypoglycemia in critically ill patients: risk factors and outcomes. *Crit Care Med*. 2007;35(10):2262–2267.
14. Umpierrez GE, Smiley D, Jacobs S, Peng L, Temponi A, Mulligan P, Umpierrez D, Newton C, Olson D, Rizzo M. Randomized study of basal-bolus insulin therapy in the inpatient management of patients with type 2 diabetes undergoing general surgery (RABBIT 2 surgery). *Diabetes Care*. 2011;34(2):256–261.
15. Umpierrez GE, Smiley D, Zisman A, Prieto LM, Palacio A, Ceron M, Puig A, Mejia R. Randomized study of basal-bolus insulin therapy in the inpatient management of patients with type 2 diabetes (RABBIT 2 trial). *Diabetes Care*. 2007;30(9):2181–2186.
16. Akirov A, Amitai O, Masri-Iraqi H, Diker-Cohen T, Shochat T, Eizenberg Y, Shimon I. Predictors of hypoglycemia in hospitalized

- patients with diabetes mellitus. *Intern Emerg Med*. 2018;13(3):343–350.
17. Akirov A, Grossman A, Shochat T, Shimon I. Mortality among hospitalized patients with hypoglycemia: insulin related and noninsulin related. *J Clin Endocrinol Metab*. 2017;102(2):416–424.
  18. Griesdale DE, de Souza RJ, van Dam RM, Heyland DK, Cook DJ, Malhotra A, Dhaliwal R, Henderson WR, Chittock DR, Finfer S, Talmor D. Intensive insulin therapy and mortality among critically ill patients: a meta-analysis including NICE-SUGAR study data. *CMAJ*. 2009;180(8):821–827.
  19. Hulkower RD, Pollack RM, Zonszein J. Understanding hypoglycemia in hospitalized patients. *Diabetes Manag (Lond)*. 2014;4(2):165–176.
  20. Wiener RS, Wiener DC, Larson RJ. Benefits and risks of tight glucose control in critically ill adults: a meta-analysis. *JAMA*. 2008;300(8):933–944.
  21. Fischer KF, Lees JA, Newman JH. Hypoglycemia in hospitalized patients. *N Engl J Med*. 1986;315(20):1245–1250.
  22. Finfer S, Liu B, Chittock DR, Norton R, Myburgh JA, McArthur C, Mitchell I, Foster D, Dhingra V, Henderson WR, Ronco JJ, Bellomo R, Cook D, McDonald E, Dodek P, Hébert PC, Heyland DK, Robinson BG; NICE-SUGAR Study Investigators. Hypoglycemia and risk of death in critically ill patients. *N Engl J Med*. 2012;367(12):1108–1118.
  23. Razavi Nematollahi L, Kitabchi AE, Stentz FB, Wan JY, Larijani BA, Tehrani MM, Gozashti MH, Omidfar K, Taheri E. Proinflammatory cytokines in response to insulin-induced hypoglycemic stress in healthy subjects [published correction appears in *Metabolism*. 2009;58(7):1046]. *Metabolism*. 2009;58(4):443–448.
  24. Kiecolt-Glaser JK, Marucha PT, Malarkey WB, Mercado AM, Glaser R. Slowing of wound healing by psychological stress. *Lancet*. 1995;346(8984):1194–1196.
  25. Norman D. The effects of stress on wound healing and leg ulceration. *Br J Nurs*. 2003;12(21):1256–1263.
  26. Christian LM, Graham JE, Padgett DA, Glaser R, Kiecolt-Glaser JK. Stress and wound healing. *Neuroimmunomodulation*. 2006;13(5-6):337–346.
  27. Chow E, Iqbal A, Walkinshaw E, Phoenix F, Macdonald IA, Storey RF, Ajjan R, Heller SR. Prolonged prothrombotic effects of antecedent hypoglycemia in individuals with type 2 diabetes. *Diabetes Care*. 2018;41(12):2625–2633.
  28. Joy NG, Tate DB, Younk LM, Davis SN. Effects of acute and antecedent hypoglycemia on endothelial function and markers of atherothrombotic balance in healthy humans. *Diabetes*. 2015;64(7):2571–2580.
  29. Dandona P, Chaudhuri A, Dhindsa S. Proinflammatory and prothrombotic effects of hypoglycemia. *Diabetes Care*. 2010;33(7):1686–1687.
